# Supplementary material for: Fermentation Characteristics and Microbiota during the Ensiling of Myriophyllum aquaticum Inoculated with Lactic Acid Bacteria
Source: MDPI journal article supplement (doi:10.3390/app12105139), 2022-05-19
Supplement: s1 [file s1]

**Table S1 Summary of sequence quantity on 16S rRNA gene**

| GROUP | INPUT | FILTERED | DENOISED | MERGED | NONCHIMERIC |
|-------|-------|----------|----------|--------|-------------|
| CK1   | 58819 | 53821    | 52814    | 50979  | 36507       |
| CK2   | 54928 | 49575    | 48481    | 46812  | 36230       |
| CK3   | 62204 | 56835    | 55741    | 53785  | 39129       |
| LB1   | 50343 | 44255    | 43794    | 43285  | 38129       |
| LB2   | 52648 | 47556    | 47075    | 46318  | 39234       |
| LB3   | 49747 | 45009    | 42065    | 33346  | 27142       |
| LP1   | 54144 | 49020    | 48444    | 47364  | 39390       |
| LP2   | 52214 | 46958    | 46385    | 44884  | 35223       |
| LP3   | 55078 | 49887    | 49363    | 48511  | 40859       |
| FH1   | 60135 | 54253    | 52577    | 49154  | 29786       |
| FH2   | 63246 | 57179    | 56989    | 56573  | 53129       |
| FH3   | 52669 | 47782    | 47440    | 46798  | 40124       |

**Table S2 Summary of sequence quantity on ITS rRNA gene**

| GROUP | INPUT  | FILTERED | DENOISED | MERGED | NONCHIMERIC |
|-------|--------|----------|----------|--------|-------------|
| CK1   | 78459  | 64040    | 63721    | 63634  | 63565       |
| CK2   | 91925  | 77174    | 76645    | 75710  | 75695       |
| CK3   | 79714  | 64250    | 64019    | 63815  | 63757       |
| LB1   | 85965  | 73327    | 72852    | 71545  | 71506       |
| LB2   | 97305  | 84168    | 83926    | 83565  | 83427       |
| LB3   | 100815 | 90611    | 89722    | 89251  | 80684       |
| LP1   | 105312 | 88603    | 87891    | 87420  | 87365       |
| LP2   | 83856  | 68955    | 68148    | 67538  | 67413       |
| LP3   | 71365  | 57804    | 56737    | 56389  | 56360       |
| FH1   | 102065 | 91211    | 90863    | 89454  | 84038       |
| FH2   | 82053  | 72292    | 71732    | 70529  | 68797       |
| FH3   | 91375  | 77866    | 77006    | 75754  | 75409       |
